# Supplementary material
Source: publisher figshare collection journal article supplement (https://karger.figshare.com/articles/dataset/_/5100184)
Supplement: Supplementary file 1 [file 1]

Please order  
your copy of the  
CD-ROM  
*'The Visible Ear'*  
against CHF 20.- /  
EUR 15.- / USD 15.00

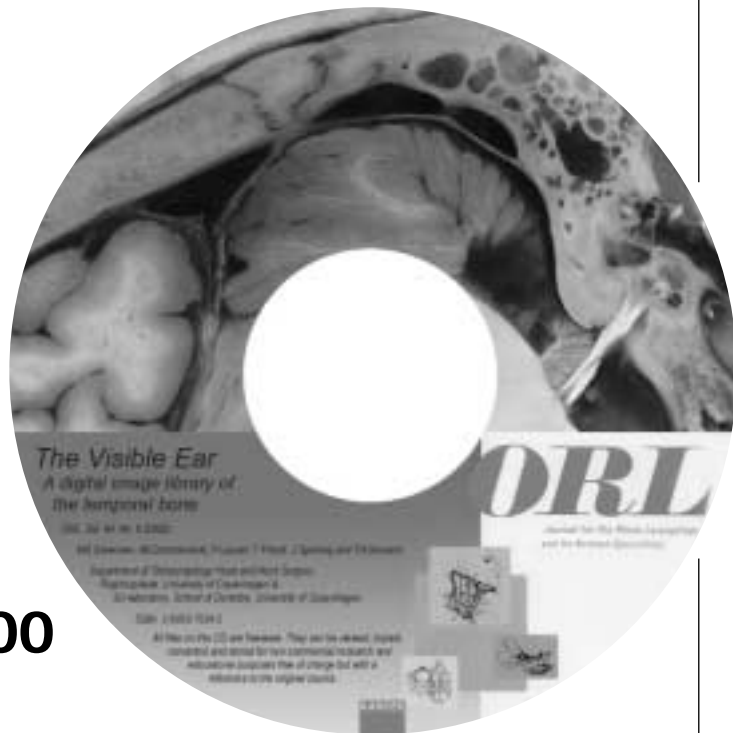

Fill in – print out – and fax or send back to +41 61 306 12 34  
**S. Karger AG**  
**P.O. Box**  
**CH-4009 Basel (Switzerland)**

**Order Form**

Please send:

— copy/ies: **CD-ROM**  
**'The Visible Ear'**  
CHF 20.- / EUR 15.- / USD 15.00  
ISBN 3-8055-7534-3

EUR price for Germany only  
USD for the USA only

S. Karger AG  
P.O.Box  
CH-4009 Basel (Switzerland)  
Fax +41 61 306 12 34  
E-mail [karger@karger.ch](mailto:karger@karger.ch)  
[www.karger.com](http://www.karger.com)

**KARGER**

**Payment:**

Please charge my credit card

☐ Eurocard ☐ MasterCard  
☐ Visa ☐ American Express

Credit card number: \_\_\_\_\_

Exp. date: \_\_\_\_\_

Name/Address (please print):  
\_\_\_\_\_  
\_\_\_\_\_  
\_\_\_\_\_  
\_\_\_\_\_

Date/Signature: \_\_\_\_\_
